# Supplementary material
Source: Research Square preprint supplement (doi:10.21203/rs.3.rs-8822166/v1)
Supplement: Supplementary file 2 [file bcaa384fea63ac5378247c93.xlsx]

## Sheet: Explainons of Cloud Metrics
Parameter	Abbreviation	Interpretation
Total return count		The total number of laser returns recorded.
Elevation maximum	Elev maximum	The maximum value of point elevations.
Elevation mean	Elev mean	The mean value of point elevations.
Elevation mode	Elev mode	The statistical mode of point elevations,which is the value that appears most frequently in the data set.
Elevation standard deviation	Elev stddev	The measure of the amount of variation or dispersion of point elevations.The square root of the variance.
Elevation variance	Elev variance	The statistical measure of the dispersion of point elevation, measures the average of the squared differences from the mean elevation
Elevation coefficient of variation	Elev CV	The ratio of the standard deviation to the mean elevation.
Elevation interquartile distance	Elev IQ	The range between the first quartile (Q1) and third quartile (Q3) of point elevation.
Elevation skewness	Elev skewness	The asymmetry of the probability distribution of point elevation.
Elevation kurtosis	Elev kurtosis	The 'tailedness' of the distribution of point elevation.
Elevation average absolute deviation	Elev AAD	The average of the absolute differences between each elevation value and the mean elevation.
Elevation median of the absolute deviations from the overall median	Elev MAD median	The median of the absolute deviations of each elevation value from the overall median elevation
Elevation median of the absolute deviations from the overall mode	Elev MAD mode	The median of the absolute differences between each elevation value and the mode of the elevations.
Elevation L-moments (L1, L2, L3, L4)	Elev L1,L2, L3, L4	A set of linear combinations of order statistics that are used to describe the distribution of elevation values.
Elevation Lation coefficient of variation	Elev L CV	The ratio of the standard deviation to the mean elevation.
Elevation Lation skewness	Elev L skewness	A measure of the asymmetry of the distribution of elevation values.
Elevation Lation kurtosis	Elev L kurtosis	A measure of the 'tailedness' and 'peakedness' of the distribution of elevation values, based on L-moments.
Elevation Percentile values (1st, 5th, 10th , 20th, 25th, 30th, 40th, 50th, 60th, 70th, 75th, 80th, 90th, 95th, 99th percentiles)	Elev P01,P05…	The height or intensity value below which a certain percentage of values in the frequency distribution falls.
Canopy relief ratio	Canopy relief ratio	A measure of the relative shape of the canopy from altimetry observation, defined as (mean height - minimum height) / (maximum height - minimum height)
Elevation Generalized means for the 2nd power	Elev SQRT mean SQ	The quadratic mean of elevation values.
Elevation Generalized means for the 3rd power	Elev CURT mean CUBE	The cube root of the arithmetic mean of the cubed elevation values.
Percentage all returns above 3.00		The proportion of all laser returns that are recorded above an elevation of 3.00 meters
All returns above 3.00		The total number of laser returns that are recorded above an elevation of 3.00 meters.
Percentage all returns above mean		The percentage of all laser returns that are recorded above the mean elevation.
Percentage all returns above mode		The percentage of all laser returns that exceed the elevation mode.
All returns above mean		The total number of laser returns that are recorded above mean value.
All returns above mode		The total number of laser returns that are recorded above statistical mode value.

## Sheet: Plot sampleing result 
Plot ID	Shallow-layer average density	Medium-layer average density	Deep-layer average density	Overage average density	Maximum rooting depth
1	3.624	2.36	1.408	7.02	87.8
2	2.31	0.64	0.995	4.62	81.7
3	2.4	2.46	0.575	5.78	64.2
4	1.916	1.34	0.846	4.278	74.6
5	2.343	1.86	1.189	5.653	74.2
6	3.507	2.354	1.3615	7.407	68.7
7	2.458	1.77	0.9525	5.245	103.3
8	1.53	0.848	1.864	3.682	81.1
9	0.96	1.728	1.0485	3.921	96.4
10	1.277	0.98	0.7115	3.19	54.2
11	2.058	3.296	0.704	6.114	44.3
12	1.644	2.844	1.032	5.12	55.7
13	2.278	2.85	0.8915	6.486	68.1
14	2.218	2.672	0.548	6.15	50.7
15	3.713	3.006	1.67	9.156	70.9
16	3.648	2.896	1.1425	7.281	69.5
17	4.263	4.316	0.904	10.229	49.8
18	1.32	0.466	0.78	3.113	71.1
19	2.46	2.786	1.2635	6.38	67.8
20	3.682	3.196	1.488	8.256	83.9
21	2.955	2.166	1.459	6.96	68.8
22	3.937	2.966	0.72	8.863	71.3
23	2.596	2.172	1.158	5.998	76.2
24	2.965	2.016	0.699	7.668	77.5
25	2.423	1.76	1.1135	6.13	65.5
26	1.853	0.32	0.6	4.481	73.6
27	2.226	1.904	2.433	5.04	69.2
28	1.79	1.456	0.9125	4.343	77.8
